# Supplementary material for: WORMHOLE: Novel Least Diverged Ortholog Prediction through Machine Learning
Source: PubMed Central journal article supplement (PMC5094675; doi:10.1371/journal.pcbi.1005182), 2016-11-03
Supplement: pcbi.1005182.s012.pdf [file pcbi.1005182.s012.pdf]

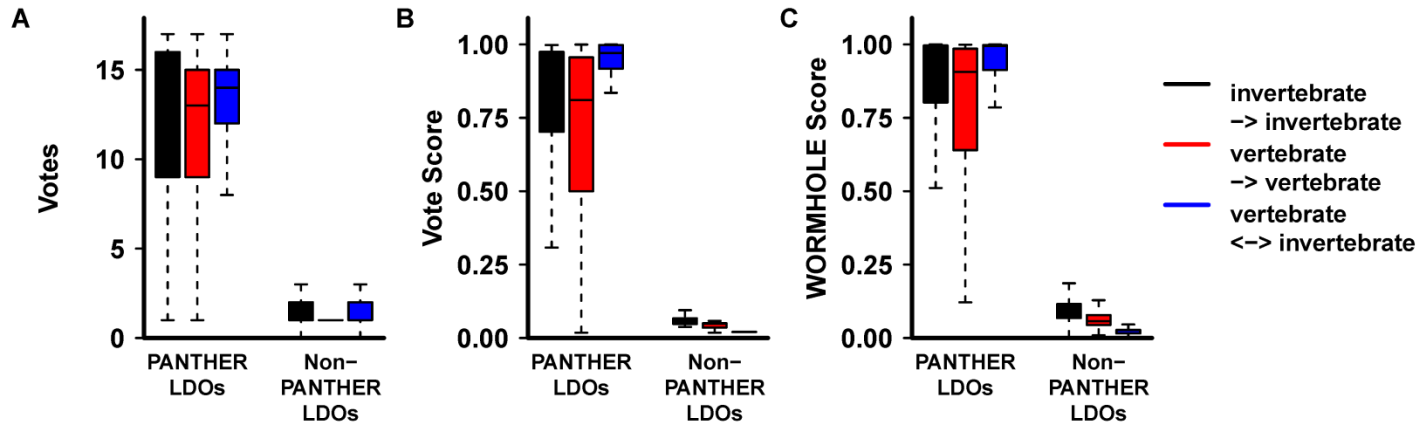

**S6 Fig. PANTHER LDOs score dramatically higher on vote and SVM confidence scores.** The number of votes (**A**), Vote Scores (**B**), or WORMHOLE Scores (**C**) received by PANTHER LDOs is dramatically higher than those received by gene pairs predicted by one or more of the constituent algorithms that are not in the PANTHER LDO set.
